# Supplementary material for: Ductular reaction-on-a-chip: Microfluidic co-cultures to study stem cell fate selection during liver injury
Source: PubMed Central journal article supplement (PMC5086854; doi:10.1038/srep36077), 2016-10-31
Supplement: srep36077-s1.pdf [file srep36077-s1.pdf]

## SUPPLEMENTARY INFORMATION

### Ductular reaction-on-a-chip: Microfluidic co-cultures to study stem cell fate selection during liver injury

Amranul Haque<sup>1,#</sup>, Pantea Gheibi<sup>1,#</sup>, Gulnaz Stybayeva<sup>1</sup>, Yandong Gao<sup>1</sup>, Natalie Torok,<sup>2</sup>

Alexander Revzin<sup>1\*</sup>

Supplementary Table 1: Primers used for transcript quantification by Real Time PCR

|                          |                             |
|--------------------------|-----------------------------|
| Human Albumin-F          | GCACAGAATCCTTGGTGAACAG      |
| Human Albumin-R          | ATGGAAGGTGAATGTTTTAGCA      |
| Human $\alpha$ AT-F      | ACTGTCAACTTCGGGGACAC        |
| Human $\alpha$ AT-R      | CATGCCTAAACGCTTCATCA        |
| Human ABCB4-F            | CTTTTCCTTGTCGCTGCTAAAT      |
| Human ABCB4-R            | AGTTCAGTGGTGTGCGTTGATGT     |
| Human Hnf1 $\beta$ (a)-F | GTACGTCAGAAAGCAACGAGAGAT    |
| Human Hnf1 $\beta$ (a)-R | TGACTGCTTTTGTCTGTCATATTTCCA |
| Human CK7-F              | AGACGGAGTTGACAGAGCTG        |
| Human CK7-R              | GGATGGCCCGGTTTCATCTC        |
| Human MRP3-F             | AAAAGCAGACGGCACGACA         |
| Human MRP3-R             | GCAGGCACTGATGAGGAAGC        |
| Human GAPDH-F            | GGTGGTCTCCTCTGACTTCAACA     |
| Human GAPDH-R            | GTGGTCGTTGAGGGCAATG         |
| Rat Albumin-F            | CATCCTGAACCGTCTGTGTG        |
| Rat Albumin-R            | TTTCCACCAAGGACCCACTA        |
| Rat HGF-F                | CTTCTGCCGGTCTCTGTTG         |
| Rat HGF-R                | TCTTCTTCTTCTGTCCTTCTGC      |
| Rat TGF- $\beta$ -F      | CCTGGAAAGGGCTCAACAC         |
| Rat TGF- $\beta$ -R      | CAGTCTTCTCTGTGGAGCTGA       |
| Rat E-cadherin-F         | CGTGGATGTGGTAGACGTGAA       |
| Rat E-cadherin-R         | TTCTTCGCAGGCACAAAAAT        |

|                       |                         |
|-----------------------|-------------------------|
| Rat Wnt5a-F           | AGCCGAGAGACAGCCTTCAC    |
| Rat Wnt5a-R           | TCCTGCGACCTGCTTCATTG    |
| Rat SMA-F             | TGCCATGTATGTGGCTATTCA   |
| Rat SMA-R             | ACCAGTTGTACGTCCAGAAGC   |
| Rat GAPDH-F           | AGACAGCCGCATCTTCTTGT    |
| Rat GAPDH-R           | CTTGCCGTGGGTAGAGTCAT    |
| Mouse Foxa2-F         | GTCGTCCGAGCAGCAACATC    |
| Mouse Foxa2-R         | GGGTAGTGCATGACCTGTTCG   |
| Mouse AFP-F           | AAAGCTGCGCTCTCTACCAG    |
| Mouse AFP-R           | GAGTTCACAGGGCTTGCTTC    |
| Mouse Albumin-F       | AGTGTTGTGCAGAGGCTGAC    |
| Mouse Albumin-R       | TTCTCCTTACACCATCAAGC    |
| Mouse CK19-F          | TGACCTGGAGATGCAGATTG    |
| Mouse CK19-R          | CCTCAGGGCAGTAATTCCTC    |
| Mouse HNF1 $\beta$ -F | AGAGCCCAGGCAGTCACA      |
| Mouse HNF1 $\beta$ -R | GGGGTTCCTGCTTATGTGC     |
| Mouse Notch2-F        | TGCCTGTTTGACAACTTTGAGT  |
| Mouse Notch2-R        | GTGGTCTGCACAGTATTTGTCAT |
| Mouse Jagged1-F       | GAGGCGTCCTCTGAAAAACA    |
| Mouse Jagged1-R       | ACCCAAGCCACTGTTAAGACA   |
| Mouse Jagged2-F       | CGTCATCCCTTTCAGTTTCG    |
| Mouse Jagged2-R       | CCTCATCTGGAGTGGTGTC A   |
| Mouse MRP3-F          | ACCAGGAGGACCATGAAGC     |
| Mouse MRP3-R          | TGTGGGTGCTGAGTGTGTCT    |
| Mouse CK18-F          | CAAGGTGAAGAGCCTGGAAA    |
| Mouse CK18-R          | AAGTCATCGGCGGCAAG       |
| Mouse GAPDH-F         | CCCCAATGTGTCCGTCGTG     |
| Mouse GAPDH-R         | GCCTGCTTACCACCTTCT      |
